# Supplementary material
Source: PubMed Central journal article supplement (PMC9092728)

# Figure S1

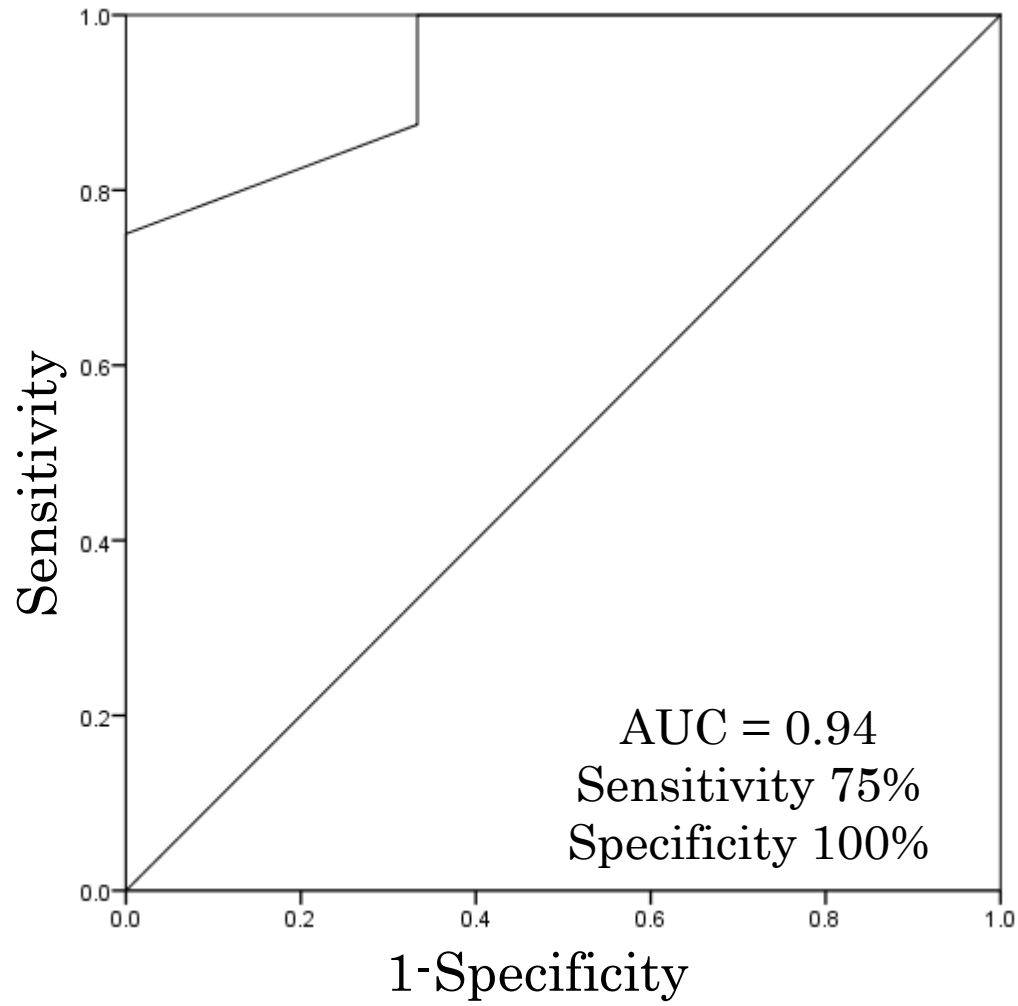

# Figure S2

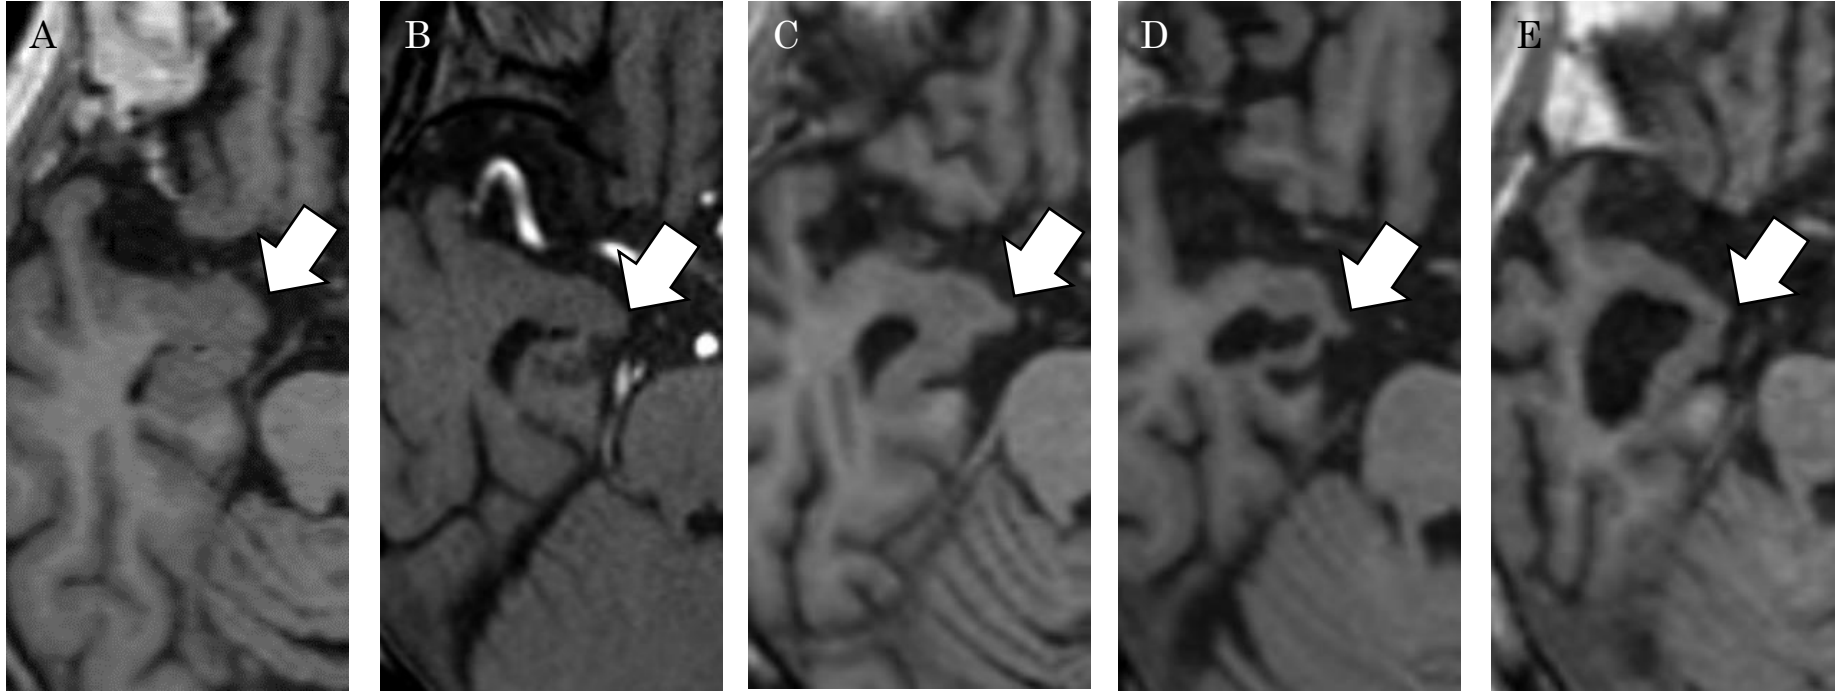

Supplement: MDC3-9-484-s002.pdf [file MDC3-9-484-s002.pdf]
